# Supplementary material for: Controlled Growth of Platinum Nanowire Arrays on Sulfur Doped Graphene as High Performance Electrocatalyst
Source: PubMed Central journal article supplement — Sci Rep. 2013 Aug 14;3:2431. doi: 10.1038/srep02431 (PMC3743054; doi:10.1038/srep02431), 2013-08-14
Supplement: srep02431-s1.pdf [file srep02431-s1.pdf]

**Supplementary information for**

**Controlled Growth of Platinum Nanowire Arrays on Sulfur Doped Graphene  
as High Performance Electrocatalyst**

Rongyue Wang, Drew C Higgins, Md. Ariful Hoque, DongUn Lee, Fathy Hassan,

Zhongwei Chen\*

Department of Chemical Engineering, Waterloo Institute for Nanotechnology,  
Waterloo Institute for Sustainable Energy, University of Waterloo, 200 University  
Avenue West, Waterloo, Ontario, N2L 3G1, Canada.

\*Corresponding author: Telephone: 1-519-888-4567 ext. 38664

E-mail: [zhwchen@uwaterloo.ca](mailto:zhwchen@uwaterloo.ca)

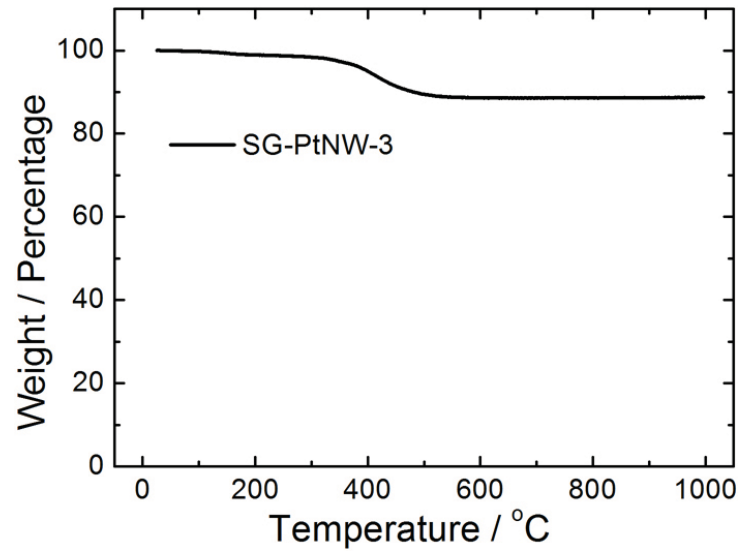

Figure S1. TGA mass loss of SG-PtNW-3 sample with the increase of temperature (heat rate: 10 °C per min) in air.

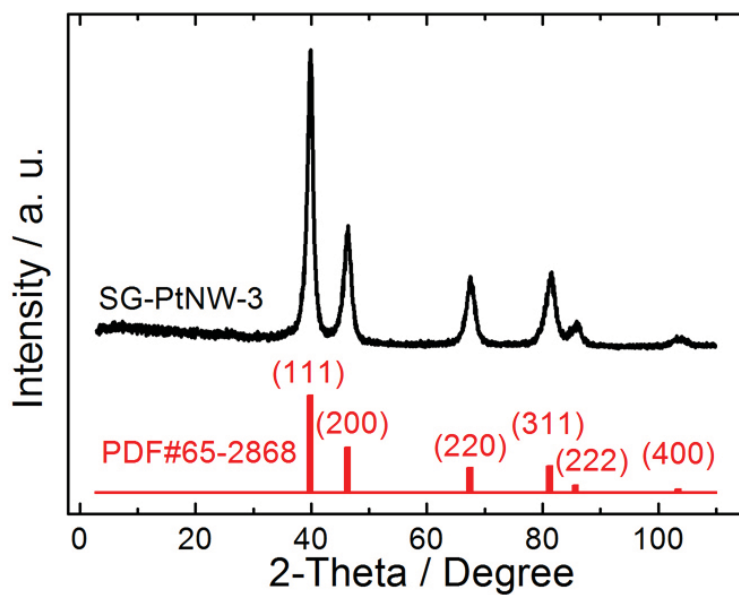

Figure S2. XRD pattern of SG-PtNW-3 sample with the standard pattern of Pt (JCPDS 65-2868) as a comparison.

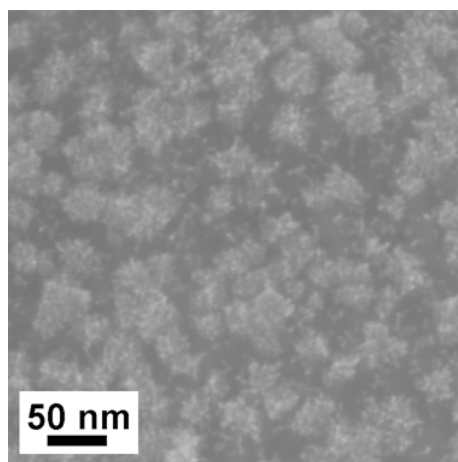

Figure S3. High resolution SEM image of SG-PtNW-1 sample shown in Figure 2a.

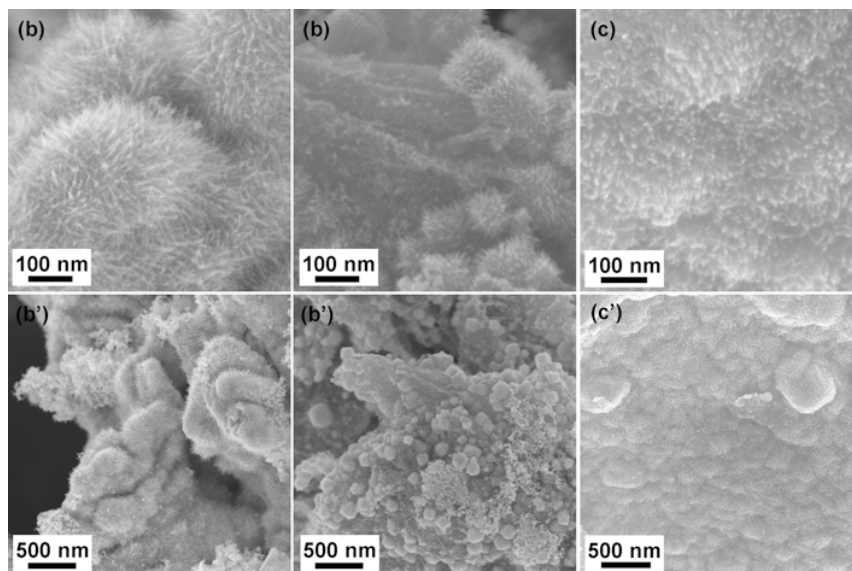

Figure S4. SEM images of Pt nanowires grown on graphene (a, a', b, and b') and sulfur doped graphene (c and c') with a Pt mass loading of 95%. Both the concentrations of G and Pt precursor in b, b' (or SG in c, and c') are half of the typical synthesis conditions.

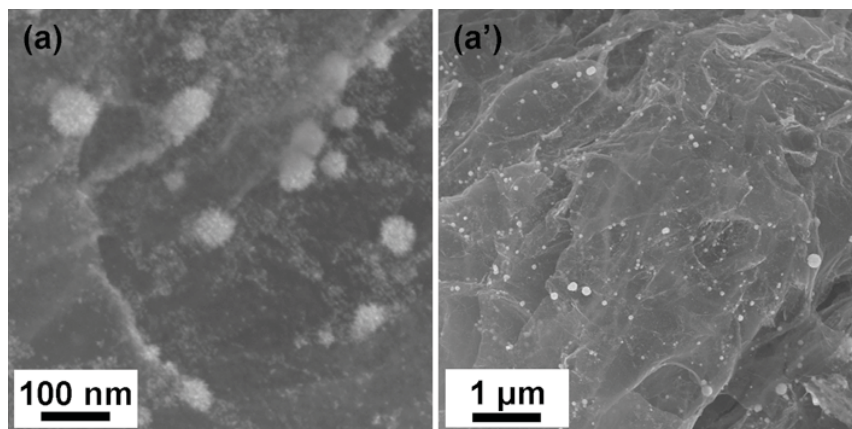

Figure S5. SEM images of Pt nanowires grown on graphene with Pt mass loading of 50.6%. Both the concentrations of G and Pt precursor are half of the typical synthesis conditions.

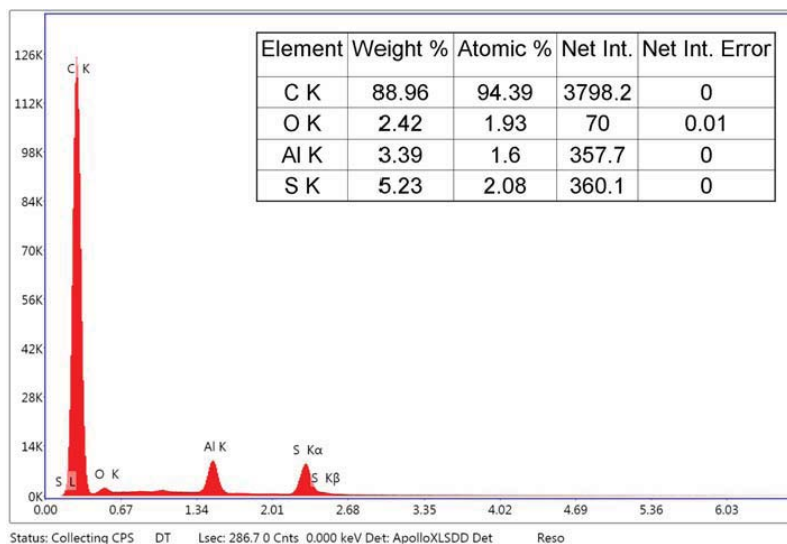

Figure S6. Energy dispersion spectroscopy (EDS) results of SG.

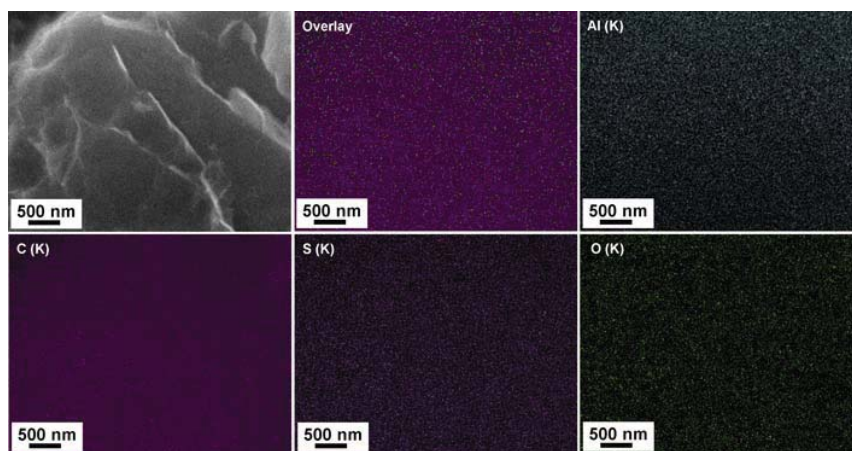

Figure S7. SEM of sulfur doped graphene and the corresponding EDS mappings which show the elemental distribution. The Al signal is from the aluminum foil which was used as a support for EDS analysis.
